# Supplementary material for: Identification of Oxindoleacetic Acid Conjugates in Quinoa (Chenopodium quinoa Willd.) Seeds by High-Resolution UHPLC-MS/MS
Source: MDPI journal article supplement (doi:10.3390/molecules27175629), 2022-08-31
Supplement: s1 [file s1]

# Identification of oxindoleacetic acid conjugates in quinoa (*Chenopodium quinoa* Willd.) seeds by high-resolution UHPLC-MS/MS

Maarit Karonen<sup>1,\*</sup> and Juha-Matti Pihlava<sup>2,\*</sup>

<sup>1</sup> Natural Chemistry Research Group, Department of Chemistry, University of Turku, 20014 Turku, Finland

<sup>2</sup> Production Systems, Natural Resources Institute Finland (Luke), Myllytie 1, 31600 Jokioinen, Finland

\* Correspondence: maarit.karonen@utu.fi (M.K.), juha-matti.pihlava@luke.fi (J.-M.P.); Tel.: +358-29-4503179 (M.K.)

## Table of Contents

**Table S1.** OTOF-data for the methyl-5-hydroxyoxindole-3-acetate (MeO-oxIAA) and 5-hydroxyoxindole-3-acetate (OH-oxIAA) glycosides having phenoyl substituents with their retention times (min), elemental composition, measured [M-H]<sup>-</sup> ions, calculated [M-H]<sup>-</sup> ions, error (ppm), characteristic MS/MS fragment ions obtained by negative ionization. FA (ferulic acid), hex (hexose), HBA (hydroxybenzoic acid), mal (malonate), n/a, not available, pent (pentose), tr (trace peak), and VA (vanillic acid). ..... **2**

**Table S2.** OTOF-data for the methyl-5-hydroxyoxindole-3-acetate (MeO-oxIAA) and 5-hydroxyoxindole-3-acetate (OH-oxIAA) glycosides having phenoyl substituents with their retention times (min), elemental composition, measured [M-H]<sup>-</sup> ions, calculated [M-H]<sup>-</sup> ions, error (ppm), characteristic MS/MS fragment ions obtained by positive ionization. FA (ferulic acid), hex (hexose), HBA (hydroxybenzoic acid), mal (malonate), n/a, not available, pent (pentose), tr (trace peak), and VA (vanillic acid). ..... **4**

**Table S1.** OTOF-data for the methyl-5-hydroxyoxindole-3-acetate (MeO-oxIAA) and 5-hydroxyoxindole-3-acetate (OH-oxIAA) glycosides having phenoyl substituents with their retention times (min), elemental composition, measured [M–H]<sup>–</sup> ions, calculated [M–H]<sup>–</sup> ions, error (ppm), characteristic MS/MS fragment ions obtained by negative ionization. FA (ferulic acid), hex (hexose), HBA (hydroxybenzoic acid), mal (malonate), n/a, not available, pent (pentose), tr (trace peak), and VA (vanillic acid).

| RT<br>(min) | Name                       | Elemental                         | Measured<br>[M–H] <sup>–</sup> | Calcu-<br>lated<br>[M–H] <sup>–</sup> | Error<br>(ppm) | Characteristic MS/MS fragments<br>in negative ionization |
|-------------|----------------------------|-----------------------------------|--------------------------------|---------------------------------------|----------------|----------------------------------------------------------|
|             |                            | composition<br>[M–H] <sup>–</sup> |                                |                                       |                |                                                          |
| 2.87        | OH-oxIAA hex               | C16H20NO9                         | 368.0972                       | 368.0982                              | -2.7           | 206, 162, 160                                            |
| 3.97        | OH-oxIAA hex-pent          | C21H26NO13                        | 500.1406                       | 500.1404                              | 0.4            | 368, 206, 162, 160                                       |
| 4.09        | OH-oxIAA hex-pent          | C21H26NO13                        | 500.1389                       | 500.1404                              | -3.0           | 368, 206, 162, 160                                       |
| 4.32        | MeO-oxIAA hex              | C17H20NO9                         | 382.1128                       | 382.1138                              | -2.6           | 220, 206, 188, 160, 147, 132                             |
| 4.81        | MeO-oxIAA hex-pent         | C22H28NO13                        | 514.1558                       | 514.1561                              | -0.6           | 482, 382, 350, 323, 282, 220, 206, 188, 162              |
| 4.89        | MeO-oxIAA hex-pent         | C22H28NO13                        | 514.1562                       | 514.1561                              | 0.2            | 482, 382, 350, 323, 282, 220, 206, 188, 162              |
| 6.24        | MeO-oxIAAe VA hex-hex-pent | C36H44NO21                        | 826.2406                       | 826.2406                              | 0.0            | 664, 556, 524, 496, 167                                  |
| 6.32        | MeO-oxIAAe VA hex-hex-pent | C36H44NO21                        | 826.2400                       | 826.2406                              | -0.7           | 664, 556, 524, 496, 167                                  |
| 6.41        | OH-oxIAA HBA hex-pent      | C28H30NO15                        | 620.1614                       | 620.1615                              | -0.2           | 500, 206, 162                                            |
| 6.50        | OH-oxIAA HBA hex-pent      | C28H30NO15                        | 620.1635                       | 620.1615                              | 3.2            | 500, 206, 162                                            |
| 6.59        | OH-oxIAA VA hex-pent       | C29H32NO16                        | 650.1724                       | 650.1721                              | 0.5            | 500, 482, 350, 206, 162, 160                             |
| 6.70        | OH-oxIAA VA hex-pent       | C29H32NO16                        | 650.1716                       | 650.1721                              | -0.8           | 500, 482, 350, 206, 162, 160                             |
| 6.96        | MeO-oxIAAe FA hex-hex-pent | C38H46NO21                        | 852.2595                       | 852.2562                              | 3.9            | 826, 788, 739, 690, 220, 193                             |
| 7.06        | MeO-oxIAAe FA hex-hex-pent | C38H46NO21                        | 852.2568                       | 852.2562                              | 0.7            | 826, 788, 739, 690, 220, 193                             |
| 7.21        | MeO-oxIAA HBA hex-pent     | C29H32NO15                        | 634.1780                       | 634.1772                              | 1.3            | 496, 220, 167, 137                                       |
| 7.34        | MeO-oxIAA HBA hex-pent     | C29H32NO15                        | 634.1782                       | 634.1772                              | 1.6            | 496, 220, 167, 137                                       |
| 7.36        | MeO-oxIAA VA hex-pent      | C30H34NO16                        | 664.1895                       | 664.1878                              | 2.6            | 496, 220, 167                                            |
| 7.48        | MeO-oxIAA VA hex-pent      | C30H34NO16                        | 664.1895                       | 664.1878                              | 2.6            | 496, 220, 167                                            |
| 7.65 (tr)   | MeO-oxIAA VA hex-pent      | C30H34NO16                        | 664.1884                       | 664.1878                              | 0.9            | n/a                                                      |

---

|           |                             |            |          |          |      |                    |
|-----------|-----------------------------|------------|----------|----------|------|--------------------|
| 7.71 (tr) | MeO-oxIAA VA hex-pent       | C30H34NO16 | 664.1881 | 664.1878 | 0.5  | n/a                |
| 7.83      | OH-oxIAA FA hex-pent        | C31H34NO16 | 676.1885 | 676.1878 | 1.0  | 206, 193, 162      |
| 8.56      | MeO-oxIAA FA hex-pent       | C32H36NO16 | 690.2048 | 690.2034 | 2.0  | 496, 220, 193, 134 |
| 8.63      | MeO-oxIAA FA hex-pent       | C32H36NO16 | 690.2043 | 690.2034 | 1.3  | 496, 220, 193, 134 |
| 8.80 (tr) | MeO-oxIAA FA hex-pent       | C32H36NO16 | 690.2036 | 690.2034 | 0.3  | 496, 220, 193, 134 |
| 8.87 (tr) | MeO-oxIAA FA hex-pent       | C32H36NO16 | 690.2037 | 690.2034 | 0.4  | 496, 220, 193, 134 |
| 9.31      | MeO-oxIAA FA hex-pent-mal   | C35H38NO19 | 776.2050 | 776.2038 | 1.5  | 732, 220, 193, 134 |
| 9.36      | MeO-oxIAA FA hex-pent-mal   | C35H38NO19 | 776.2036 | 776.2038 | -0.3 | 732, 220, 193, 134 |
| 9.74      | unknown MeO-oxIAA conjugate | C32H40NO16 | 694.2346 | 694.2347 | -0.1 | 496, 220, 153      |
| 9.82      | unknown MeO-oxIAA conjugate | C32H40NO16 | 694.2336 | 694.2347 | -1.6 | 496, 220, 153      |
| 10.32     | unknown MeO-oxIAA conjugate | C37H46NO16 | 760.2811 | 760.2817 | -0.8 | 482, 263, 220, 153 |
| 10.39     | unknown MeO-oxIAA conjugate | C37H46NO16 | 760.2811 | 760.2817 | -0.8 | 482, 263, 220, 153 |

---

**Table S2.** OTOF-data for the methyl-5-hydroxyoxindole-3-acetate (MeO-oxIAA) and 5-hydroxyoxindole-3-acetate (OH-oxIAA) glycosides having phenoyl substituents with their retention times (min), elemental composition, measured [M–H]<sup>–</sup> ions, calculated [M–H]<sup>–</sup> ions, error (ppm), characteristic MS/MS fragment ions obtained by positive ionization. FA (ferulic acid), hex (hexose), HBA (hydroxybenzoic acid), mal (malonate), n/a, not available, pent (pentose), tr (trace peak), and VA (vanillic acid).

| RT<br>(min) | Name                       | Elemental<br>composition | Measured           | Calcu-<br>lated    | Error | Characteristic MS/MS fragments<br>in positive ionization |
|-------------|----------------------------|--------------------------|--------------------|--------------------|-------|----------------------------------------------------------|
|             |                            | [M+H] <sup>+</sup>       | [M+H] <sup>+</sup> | [M+H] <sup>+</sup> | (ppm) |                                                          |
| 2.87        | OH-oxIAA hex               | n/a                      |                    |                    |       |                                                          |
| 3.97        | OH-oxIAA hex-pent          | C21H28NO13               | 502.1562           | 502.1561           | 0.2   | 424, 370, 208                                            |
| 4.09        | OH-oxIAA hex-pent          | C21H28NO13               | 502.1563           | 502.1561           | 0.4   | 424, 370, 208                                            |
| 4.32        | MeO-oxIAA hex              | C17H22NO9                | 384.1285           | 384.1295           | -2.6  | 222, 190, 162, 144, 116                                  |
| 4.81        | MeO-oxIAA hex-pent         | C22H30NO13               | 516.1711           | 516.1717           | -1.2  | 222, 190, 162, 144, 116                                  |
| 4.89        | MeO-oxIAA hex-pent         | C22H30NO13               | 516.1705           | 516.1717           | -2.3  | 222, 190, 162, 144, 116                                  |
| 6.24        | MeO-oxIAAe VA hex-hex-pent | C36H46NO21               | 828.2567           | 828.2562           | 0.6   | 666, 384, 283, 222, 190, 162, 144, 116                   |
| 6.32        | MeO-oxIAAe VA hex-hex-pent | C36H46NO21               | 828.2571           | 828.2562           | 1.1   | 666, 384, 283, 222, 190, 162, 144, 116                   |
| 6.41        | OH-oxIAA HBA hex-pent      | C28H32NO15               | 622.1951           | 622.1925           | 4.2   | n/a                                                      |
| 6.50        | OH-oxIAA HBA hex-pent      | n/a                      |                    |                    |       |                                                          |
| 6.59        | OH-oxIAA VA hex-pent       | n/a                      |                    |                    |       |                                                          |
| 6.70        | OH-oxIAA VA hex-pent       | n/a                      |                    |                    |       |                                                          |
| 6.96        | MeO-oxIAAe FA hex-hex-pent | C38H48NO21               | 854.2765           | 854.2719           | 5.4   | 692, 365, 222, 177, 162, 144                             |
| 7.06        | MeO-oxIAAe FA hex-hex-pent | C38H48NO21               | 854.2702           | 854.2719           | -2.0  | 692, 365, 222, 177, 162, 144                             |
| 7.21        | MeO-oxIAA HBA hex-pent     | C29H34NO15               | 636.1937           | 636.1928           | 1.4   | 222, 190, 162, 144                                       |
| 7.34        | MeO-oxIAA HBA hex-pent     | C29H34NO15               | 636.1959           | 636.1928           | 4.9   | 222, 190, 162, 144                                       |
| 7.36        | MeO-oxIAA VA hex-pent      | C30H36NO16               | 666.2029           | 666.2034           | -0.8  | 666, 384, 283, 222, 190, 162, 144, 116                   |
| 7.48        | MeO-oxIAA VA hex-pent      | C30H36NO16               | 666.2041           | 666.2034           | 1.1   | 666, 384, 283, 222, 190, 162, 144, 116                   |
| 7.65 (tr)   | MeO-oxIAA VA hex-pent      | n/a                      |                    |                    |       |                                                          |
| 7.71 (tr)   | MeO-oxIAA VA hex-pent      | n/a                      |                    |                    |       |                                                          |
| 7.83        | OH-oxIAA FA hex-pent       | n/a                      |                    |                    |       |                                                          |

---

|           |                             |            |          |          |      |                             |
|-----------|-----------------------------|------------|----------|----------|------|-----------------------------|
| 8.56      | MeO-oxIAA FA hex-pent       | C32H38NO16 | 692.2198 | 692.2191 | 1.0  | 617, 291, 222, 177, 144     |
| 8.63      | MeO-oxIAA FA hex-pent       | C32H38NO16 | 692.2193 | 692.2191 | 0.3  | 617, 291, 222, 177, 144     |
| 8.8 (tr)  | MeO-oxIAA FA hex-pent       | C32H38NO16 | 692.215  | 692.2191 | -5.9 | 222, 177, 144               |
| 8.87 (tr) | MeO-oxIAA FA hex-pent       | C32H38NO16 | 692.2161 | 692.2191 | -4.3 | 222, 177, 144               |
| 9.31      | MeO-oxIAA FA hex-pent-mal   | C35H40NO19 | 778.2217 | 778.2195 | 2.8  | 748, 667, 222, 177, 162,144 |
| 9.36      | MeO-oxIAA FA hex-pent-mal   | C35H40NO19 | 778.2227 | 778.2195 | 4.1  | 222, 177, 162,144           |
| 9.74      | unknown MeO-oxIAA conjugate | C32H42NO16 | 696.2488 | 696.2504 | -2.3 | 222                         |
| 9.82      | unknown MeO-oxIAA conjugate | C32H42NO16 | 696.2505 | 696.2504 | 0.1  | 222                         |
| 10.32     | unknown MeO-oxIAA conjugate | C37H48NO16 | 762.3007 | 762.2973 | 4.5  | 222                         |
| 10.39     | unknown MeO-oxIAA conjugate | C37H48NO16 | 762.3044 | 762.2973 | 9.3  | 222                         |

---
